# Supplementary material for: Volatile Oil in Pinus yunnanensis Potentially Contributes to Extreme Fire Behavior
Source: MDPI journal article supplement (doi:10.3390/fire6030113), 2023-03-12
Supplement: s1 [file s1]

## Supplementary Materials

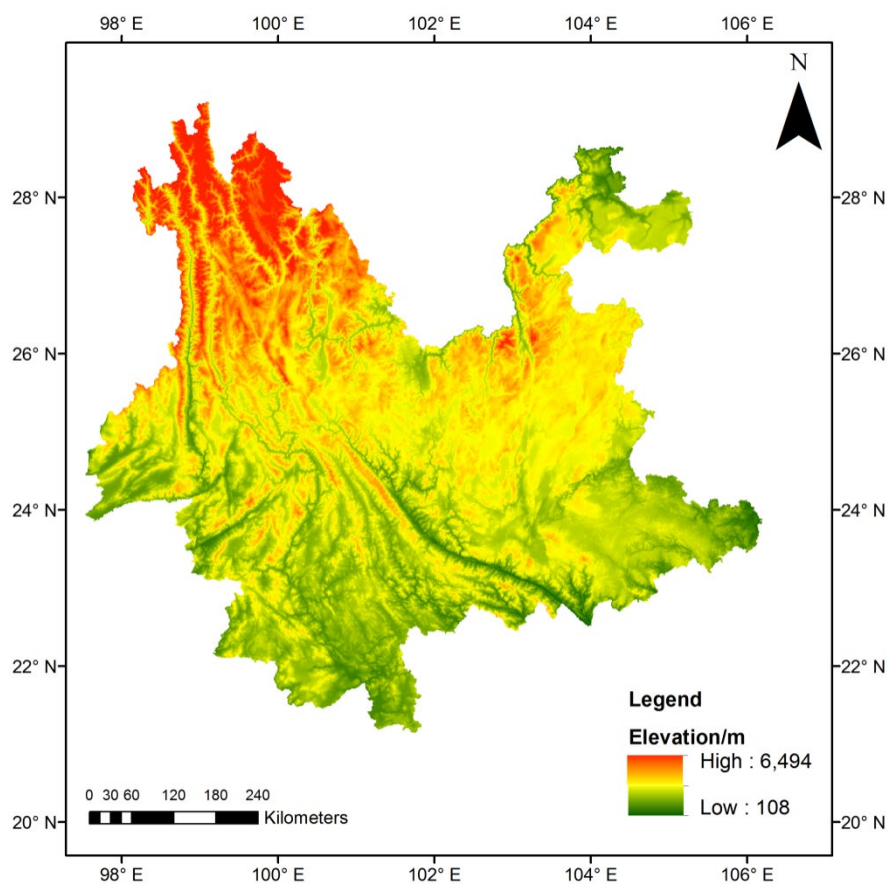

**Figure S1.** Elevation analysis map of Yunnan Province.

**Table S1.** Formulas, boiling points and flash points of the main terpenoids in *P. yunnanensis*.

|                | Name                   | Formula                           | CAS        | Boiling Point (°C) | Flash Point (°C) |
|----------------|------------------------|-----------------------------------|------------|--------------------|------------------|
| Monoterpenes   | $\alpha$ -tricyclene   | C <sub>10</sub> H <sub>16</sub>   | 508-32-7   | 150-152            | 26               |
|                | $\alpha$ -pinene       | C <sub>10</sub> H <sub>16</sub>   | 7785-70-8  | 155-156            | 32               |
|                | camphene               | C <sub>10</sub> H <sub>16</sub>   | 79-92-5    | 159-160            | 36               |
|                | sabinene               | C <sub>10</sub> H <sub>16</sub>   | 3387-41-5  | 163-164            | 37               |
|                | $\beta$ -pinene        | C <sub>10</sub> H <sub>16</sub>   | 127-91-3   | 165-167            | 32               |
|                | $\beta$ -myrcene       | C <sub>10</sub> H <sub>16</sub>   | 123-35-3   | 167-168            | 37               |
|                | limonene               | C <sub>10</sub> H <sub>16</sub>   | 5989-27-5  | 176-177            | 48               |
|                | $\gamma$ -Terpinene    | C <sub>10</sub> H <sub>16</sub>   | 99-86-5    | 174-175            | 46               |
|                | terpinolene            | C <sub>10</sub> H <sub>16</sub>   | 586-62-9   | 186-187            | 37               |
|                | p-cymene               | C <sub>10</sub> H <sub>14</sub>   | 99-87-6    | 176-178            | 47               |
|                | linalool               | C <sub>10</sub> H <sub>18</sub> O | 78-70-6    | 198-199            | 55               |
| Sesquiterpenes | $\beta$ -elemene       | C <sub>15</sub> H <sub>24</sub>   | 515-13-9   | 251-253            | 98               |
|                | $\beta$ -caryophyllene | C <sub>15</sub> H <sub>24</sub>   | 87-44-5    | 254-257            | 97               |
|                | humulene               | C <sub>15</sub> H <sub>24</sub>   | 6753-98-6  | 166-168            | 90               |
|                | germacrene D           | C <sub>15</sub> H <sub>24</sub>   | 37839-63-7 | 279-280            | 112              |
|                | farnesol               | C <sub>15</sub> H <sub>26</sub> O | 4602-84-0  | 283-284            | 112              |
|                | germacrene B           | C <sub>15</sub> H <sub>24</sub>   | 15423-57-1 | 287-288            | 116              |

|        |                     |                                                |            |         |     |
|--------|---------------------|------------------------------------------------|------------|---------|-----|
|        | $\alpha$ -Muurolene | C <sub>15</sub> H <sub>24</sub>                | 10208-80-7 | 271-272 | 107 |
|        | $\gamma$ -Muurolene | C <sub>15</sub> H <sub>24</sub>                | 1460-97-5  | 272-273 | 107 |
|        | isobornyl acetate   | C <sub>12</sub> H <sub>20</sub> O <sub>2</sub> | 125-12-2   | 220-224 | 84  |
|        | $\delta$ -Cadinene  | C <sub>15</sub> H <sub>24</sub>                | 483-76-1   | 277-278 | 38  |
| Others | pinocarveol         | C <sub>10</sub> H <sub>16</sub> O              | 5947-36-4  | 217-218 | 90  |
|        | terpinen-4-ol       | C <sub>10</sub> H <sub>18</sub> O              | 562-74-3   | 208-210 | 79  |
|        | $\alpha$ -Terpineol | C <sub>10</sub> H <sub>18</sub> O              | 10482-56-1 | 217-218 | 90  |
|        | spathulenol         | C <sub>15</sub> H <sub>24</sub> O              | 6750-60-3  | 284-285 | 124 |
|        | caryophyllene oxide | C <sub>15</sub> H <sub>24</sub> O              | 1139-30-6  | 301-302 | 110 |
|        | $\tau$ -Cadinol     | C <sub>15</sub> H <sub>26</sub> O              | 5937-11-1  | 272-334 | 128 |
|        | $\alpha$ -Cadinol   | C <sub>15</sub> H <sub>26</sub> O              | 481-34-5   | 303-304 | 128 |
|        | sclareol            | C <sub>20</sub> H <sub>36</sub> O <sub>2</sub> | 515-03-7   | 218-220 | 169 |
